# Supplementary material for: Homo- and heteroleptic alkoxycarbene f-element complexes and their reactivity towards acidic N–H and C–H bonds
Source: Royal Society of Chemistry journal article supplement (doi:10.1039/c4dt01442a), 2014-01-01
Supplement: c4dt01442a1.pdf [file c4dt01442a1.pdf]

## **Homo- and heteroleptic alkoxy-carbene f-element complexes and their reactivity towards acidic N-H and C-H bonds**

**Polly L. Arnold<sup>\*a</sup>, Thomas Cadenbach<sup>a</sup>, Isobel A. Marr<sup>a</sup>, Andrew A. Fyfe<sup>a</sup>, Nicola L. Bell<sup>a</sup>, Ronan Bellabarba<sup>b</sup>, Robert P. Tooze<sup>b</sup>, and Jason B. Love<sup>\*a</sup>**

<sup>a</sup> *EaStCHEM School of Chemistry, University of Edinburgh, The King's Buildings, West Mains Road, Edinburgh, EH9 3JJ, UK.  
E-mail: [jason.love@ed.ac.uk](mailto:jason.love@ed.ac.uk), [polly.arnold@ed.ac.uk](mailto:polly.arnold@ed.ac.uk)*

<sup>b</sup> *Sasol Technology UK, Purdie Building, North Haugh, St Andrews, KY16 9SR, UK*

### **Supplementary Information**

Crystallographic data were collected on an Oxford Diffraction Xcalibur diffractometer using graphite-monochromated Mo K $\alpha$  radiation ( $\lambda = 0.71073 \text{ \AA}$ ).

**Table S1.** Experimental details for the crystal structure refinements

| Crystal parameters                                      | 1-Y                                                                    | 1-Sc                                                                   | 1-Ce                                                                   | 2-Y                                                                    |
|---------------------------------------------------------|------------------------------------------------------------------------|------------------------------------------------------------------------|------------------------------------------------------------------------|------------------------------------------------------------------------|
| Empirical formula                                       | C <sub>20</sub> H <sub>27</sub> N <sub>2</sub> OY                      | C <sub>20</sub> H <sub>27</sub> N <sub>2</sub> OSe                     | C <sub>24</sub> H <sub>35</sub> CeN <sub>2</sub> O <sub>2</sub>        | C <sub>25</sub> H <sub>39</sub> N <sub>4</sub> O <sub>2</sub> Y        |
| Molecular weight [g/mol]                                | 400.34                                                                 | 356.39                                                                 | 523.66                                                                 | 516.51                                                                 |
| Temperature [K]                                         | 173(2)                                                                 | 170(2)                                                                 | 173(2)                                                                 | 173(2)                                                                 |
| Wavelength Mo-K $\alpha$ [ $\text{\AA}$ ]               | 0.71073                                                                | 0.71073                                                                | 0.71073                                                                | 0.71073                                                                |
| Crystal size [mm]                                       | 0.35 $\times$ 0.20 $\times$ 0.20                                       | 0.77 $\times$ 0.37 $\times$ 0.23                                       | 0.70 $\times$ 0.49 $\times$ 0.40                                       | 0.35 $\times$ 0.25 $\times$ 0.20                                       |
| Crystal system                                          | Orthorhombic                                                           | Orthorhombic                                                           | Monoclinic                                                             | Triclinic                                                              |
| space group                                             | Pna2 <sub>1</sub>                                                      | Pna2 <sub>1</sub>                                                      | P2(1)/c                                                                | P-1                                                                    |
| <i>a</i> ( $\text{\AA}$ )                               | 16.6328(7)                                                             | 16.7257(3)                                                             | 10.3917(11)                                                            | 10.0822(11)                                                            |
| <i>b</i> ( $\text{\AA}$ )                               | 8.2556(3)                                                              | 8.10390(10)                                                            | 16.4222(4)                                                             | 16.768(2)                                                              |
| <i>c</i> ( $\text{\AA}$ )                               | 14.5112(6)                                                             | 13.9844(3)                                                             | 15.567(3)                                                              | 17.2137(15)                                                            |
| $\alpha$ ( $^\circ$ )                                   | 90                                                                     | 90                                                                     | 90                                                                     | 109.721(9)                                                             |
| $\beta$ ( $^\circ$ )                                    | 90                                                                     | 90                                                                     | 108.53(2)                                                              | 90.413(8)                                                              |
| $\gamma$ ( $^\circ$ )                                   | 90                                                                     | 90                                                                     | 90                                                                     | 91.683(9)                                                              |
| Cell volume [ $\text{\AA}^3$ ]                          | 1992.59(14)                                                            | 1895.49(6)                                                             | 2518.8(6)                                                              | 2737.7(5)                                                              |
| <i>Z</i>                                                | 4                                                                      | 4                                                                      | 4                                                                      | 4                                                                      |
| Density $\rho_{\text{calc}}$ [g cm <sup>-3</sup> ]      | 1.335                                                                  | 1.249                                                                  | 1.381                                                                  | 1.253                                                                  |
| Absorption coefficient $\mu$ [mm <sup>-1</sup> ]        | 2.935                                                                  | 0.396                                                                  | 1.827                                                                  | 2.156                                                                  |
| <i>F</i> (000)                                          | 832                                                                    | 760                                                                    | 1068                                                                   | 1088                                                                   |
| $\theta$ range for data collection [ $^\circ$ ]         | 3.09 - 30.30                                                           | 2.91 - 27.48                                                           | 3.79 - 29.95                                                           | 3.15 - 29.74                                                           |
| Index ranges                                            | -21 $\leq h \leq$ 22,<br>-11 $\leq k \leq$ 11,<br>-18 $\leq l \leq$ 20 | -21 $\leq h \leq$ 21,<br>-10 $\leq k \leq$ 10,<br>-18 $\leq l \leq$ 18 | -13 $\leq h \leq$ 13,<br>-21 $\leq k \leq$ 21,<br>-19 $\leq l \leq$ 18 | -13 $\leq h \leq$ 13,<br>-22 $\leq k \leq$ 23,<br>-22 $\leq l \leq$ 19 |
| Reflections collected                                   | 22991                                                                  | 17354                                                                  | 17031                                                                  | 25848                                                                  |
| Reflections unique                                      | 5331 [ $R_{\text{int}} = 0.0674$ ]                                     | 4341 [ $R_{\text{int}} = 0.0301$ ]                                     | 5502 [ $R_{\text{int}} = 0.0199$ ]                                     | 13239 [ $R_{\text{int}} = 0.0382$ ]                                    |
| Refinement method                                       | Full-matrix least-squares on $F^2$                                     |
| Data/Restraints/Parameters                              | 5331/1/221                                                             | 4341/1/221                                                             | 5502/0/272                                                             | 13239/46/602                                                           |
| Absorption correction                                   | Multi-Scan                                                             | Multi-Scan                                                             | Multi-Scan                                                             | Multi-Scan                                                             |
| Goodness-of-fit on $F^2$ ( <i>GOF</i> )                 | 1.028                                                                  | 1.045                                                                  | 1.071                                                                  | 1.040                                                                  |
| Final <i>R</i> indices [ $I > 2\sigma(I)$ ]             | $R_1 = 0.0477$ ,<br>$wR_2 = 0.0753$                                    | $R_1 = 0.0295$ ,<br>$wR_2 = 0.06588$                                   | $R_1 = 0.0326$ ,<br>$wR_2 = 0.0753$                                    | $R_1 = 0.0480$ ,<br>$wR_2 = 0.0778$                                    |
| <i>R</i> indices (all data)                             | $R_1 = 0.0897$ ,<br>$wR_2 = 0.0859$                                    | $R_1 = 0.0349$ ,<br>$wR_2 = 0.0686$                                    | $R_1 = 0.0408$ ,<br>$wR_2 = 0.0823$                                    | $R_1 = 0.0854$ ,<br>$wR_2 = 0.0888$                                    |
| Largest difference peak and hole (e $\text{\AA}^{-3}$ ) | 0.502 and -0.387                                                       | 0.192 and -0.178                                                       | 1.897 and -1.119                                                       | 0.487 and -0.509                                                       |

**Table S1** (continued).

| Crystal parameters                                           | 4                                                                                              | 5                                                                   | 6                                                                   | 7                                                                                                |
|--------------------------------------------------------------|------------------------------------------------------------------------------------------------|---------------------------------------------------------------------|---------------------------------------------------------------------|--------------------------------------------------------------------------------------------------|
| Empirical formula                                            | C <sub>40</sub> H <sub>68</sub> N <sub>8</sub> O <sub>4</sub> Th·C <sub>7</sub> H <sub>8</sub> | C <sub>24</sub> H <sub>32</sub> N <sub>3</sub> OY                   | C <sub>28</sub> H <sub>34</sub> N <sub>3</sub> OY                   | C <sub>30</sub> H <sub>51</sub> N <sub>6</sub> O <sub>3</sub> Sc·C <sub>4</sub> H <sub>5</sub> N |
| Molecular weight [g/mol]                                     | 1049.20                                                                                        | 467.43                                                              | 517.49                                                              | 655.82                                                                                           |
| Temperature [K]                                              | 173(2)                                                                                         | 173(2)                                                              | 173(2)                                                              | 170(2)                                                                                           |
| Wavelength Mo-K <sub>α</sub> [Å]                             | 0.71073                                                                                        | 0.71073                                                             | 0.71073                                                             | 0.71073                                                                                          |
| Crystal size [mm]                                            | 0.27 × 0.27 × 0.05                                                                             | 0.94 × 0.43 × 0.32                                                  | 0.91 × 0.38 × 0.30                                                  | 0.78 × 0.64 × 0.46                                                                               |
| Crystal system                                               | Triclinic                                                                                      | Monoclinic                                                          | Monoclinic                                                          | Triclinic                                                                                        |
| space group                                                  | P-1                                                                                            | C 2/c                                                               | P2(1)/c                                                             | P-1                                                                                              |
| <i>a</i> (Å)                                                 | 12.3655(4)                                                                                     | 17.5456(5)                                                          | 9.0723(11)                                                          | 10.3280(3)                                                                                       |
| <i>b</i> (Å)                                                 | 13.2013(5)                                                                                     | 15.6123(5)                                                          | 15.3819(8)                                                          | 11.0932(3)                                                                                       |
| <i>c</i> (Å)                                                 | 15.6014(5)                                                                                     | 16.8818(5)                                                          | 20.696(2)                                                           | 17.6674(5)                                                                                       |
| $\alpha$ (°)                                                 | 101.035(3)                                                                                     | 90                                                                  | 90                                                                  | 74.577(3)                                                                                        |
| $\beta$ (°)                                                  | 90.494(2)                                                                                      | 92.453(3)                                                           | 103.351(11)                                                         | 89.538(2)                                                                                        |
| $\gamma$ (°)                                                 | 95.738(3)                                                                                      | 90                                                                  | 90                                                                  | 75.363(2)                                                                                        |
| Cell volume [Å <sup>3</sup> ]                                | 2486.16(15)                                                                                    | 4620.1(2)                                                           | 2810.1(5)                                                           | 1884.15(9)                                                                                       |
| <i>Z</i>                                                     | 2                                                                                              | 8                                                                   | 4                                                                   | 2                                                                                                |
| Density $\rho_{\text{calc}}$ [g cm <sup>-3</sup> ]           | 1.401                                                                                          | 1.344                                                               | 1.223                                                               | 1.156                                                                                            |
| Absorption coefficient $\mu$ [mm <sup>-1</sup> ]             | 3.079                                                                                          | 2.543                                                               | 2.097                                                               | 0.236                                                                                            |
| <i>F</i> (000)                                               | 810                                                                                            | 1952                                                                | 1080                                                                | 1.156                                                                                            |
| $\theta$ range for data collection [°]                       | 2.9 - 27.5                                                                                     | 3.02 - 27.06                                                        | 3.00 - 27.00                                                        | 3.49 - 29.24                                                                                     |
| Index ranges                                                 | -16 ≤ <i>h</i> ≤ 16,<br>-17 ≤ <i>k</i> ≤ 17,<br>-20 ≤ <i>l</i> ≤ 20                            | -21 ≤ <i>h</i> ≤ 22,<br>-19 ≤ <i>k</i> ≤ 19,<br>-21 ≤ <i>l</i> ≤ 21 | -11 ≤ <i>h</i> ≤ 11,<br>-19 ≤ <i>k</i> ≤ 19,<br>-26 ≤ <i>l</i> ≤ 26 | -13 ≤ <i>h</i> ≤ 13,<br>-14 ≤ <i>k</i> ≤ 14,<br>-22 ≤ <i>l</i> ≤ 22                              |
| Reflections collected                                        | 45682                                                                                          | 15469                                                               | 19195                                                               | 34913                                                                                            |
| Reflections unique                                           | 11383 [ <i>R</i> <sub>int</sub> = 0.067]                                                       | 5055 [ <i>R</i> <sub>int</sub> = 0.0316]                            | 6156 [ <i>R</i> <sub>int</sub> = 0.0419]                            | 7093 [ <i>R</i> <sub>int</sub> = 0.0310]                                                         |
| Refinement method                                            | Full-matrix least-squares on <i>F</i> <sup>2</sup>                                             | Full-matrix least-squares on <i>F</i> <sup>2</sup>                  | Full-matrix least-squares on <i>F</i> <sup>2</sup>                  | Full-matrix least-squares on <i>F</i> <sup>2</sup>                                               |
| Data/Restraints/Parameters                                   | 11383/0/558                                                                                    | 5055/0/266                                                          | 6156/0/302                                                          | 7093/0/418                                                                                       |
| Absorption correction                                        | Multi-Scan                                                                                     | Multi-Scan                                                          | Multi-Scan                                                          | Multi-Scan                                                                                       |
| Goodness-of-fit on <i>F</i> <sup>2</sup> ( <i>GOF</i> )      | 1.035                                                                                          | 1.026                                                               | 1.053                                                               | 1.026                                                                                            |
| Final <i>R</i> indices [ <i>I</i> > 2 $\sigma$ ( <i>I</i> )] | <i>R</i> <sub>1</sub> = 0.0445,<br><i>wR</i> <sub>2</sub> = 0.1071                             | <i>R</i> <sub>1</sub> = 0.0318,<br><i>wR</i> <sub>2</sub> = 0.0716  | <i>R</i> <sub>1</sub> = 0.0458,<br><i>wR</i> <sub>2</sub> = 0.1109  | <i>R</i> <sub>1</sub> = 0.0383,<br><i>wR</i> <sub>2</sub> = 0.0900                               |
| <i>R</i> indices (all data)                                  | <i>R</i> <sub>1</sub> = 0.0557,<br><i>wR</i> <sub>2</sub> = 0.1122                             | <i>R</i> <sub>1</sub> = 0.0513,<br><i>wR</i> <sub>2</sub> = 0.0777  | <i>R</i> <sub>1</sub> = 0.0774,<br><i>wR</i> <sub>2</sub> = 0.1192  | <i>R</i> <sub>1</sub> = 0.0511,<br><i>wR</i> <sub>2</sub> = 0.0973                               |
| Largest difference peak and hole (e Å <sup>-3</sup> )        | 3.882 and -2.568                                                                               | 0.334 and -0.357                                                    | 0.578 and -0.482                                                    | 0.238 and -0.334                                                                                 |

**Table S1** (continued).

| Crystal parameters                                           | <b>8a</b>                                                                        | <b>9</b>                                                                                      | <b>10</b>                                                           |
|--------------------------------------------------------------|----------------------------------------------------------------------------------|-----------------------------------------------------------------------------------------------|---------------------------------------------------------------------|
| Empirical formula                                            | C <sub>25</sub> H <sub>33</sub> CeN <sub>2</sub> O·C <sub>6</sub> H <sub>6</sub> | C <sub>30</sub> H <sub>46</sub> N <sub>4</sub> O <sub>2</sub> Y·C <sub>5</sub> H <sub>5</sub> | C <sub>35</sub> H <sub>41</sub> N <sub>2</sub> O <sub>2</sub> Y     |
| Molecular weight [g/mol]                                     | 595.76                                                                           | 648.70                                                                                        | 610.61                                                              |
| Temperature [K]                                              | 173(2)                                                                           | 173(2)                                                                                        | 173(2)                                                              |
| Wavelength Mo-K <sub>α</sub> [Å]                             | 0.71073                                                                          | 0.71073                                                                                       | 0.71073                                                             |
| Crystal size [mm]                                            | 0.98 × 0.68 × 0.32                                                               | 0.64 × 0.42 × 0.17                                                                            | 0.74 × 0.19 × 0.16                                                  |
| Crystal system                                               | Triclinic                                                                        | Tetragonal                                                                                    | Orthorhombic                                                        |
| space group                                                  | P-1                                                                              | I4(1)/acd                                                                                     | P2(1)2(1)2(1)                                                       |
| <i>a</i> (Å)                                                 | 11.2916(4)                                                                       | 17.618(5)                                                                                     | 11.0941(8)                                                          |
| <i>b</i> (Å)                                                 | 12.0218(4)                                                                       | 17.618(5)                                                                                     | 13.9218(9)                                                          |
| <i>c</i> (Å)                                                 | 12.7949(6)                                                                       | 47.904(5)                                                                                     | 27.1465(13)                                                         |
| $\alpha$ (°)                                                 | 108.824(4)                                                                       | 90                                                                                            | 90                                                                  |
| $\beta$ (°)                                                  | 95.048(3)                                                                        | 90                                                                                            | 90                                                                  |
| $\gamma$ (°)                                                 | 95.048(3)                                                                        | 90                                                                                            | 90                                                                  |
| Cell volume [Å <sup>3</sup> ]                                | 1420.72(11)                                                                      | 14869(9)                                                                                      | 4192.8(5)                                                           |
| <i>Z</i>                                                     | 2                                                                                | 16                                                                                            | 4                                                                   |
| Density $\rho_{\text{calc}}$ [g cm <sup>-3</sup> ]           | 1.393                                                                            | 1.159                                                                                         | 0.967                                                               |
| Absorption coefficient $\mu$ [mm <sup>-1</sup> ]             | 1.626                                                                            | 1.601                                                                                         | 1.415                                                               |
| <i>F</i> (000)                                               | 610                                                                              | 5504                                                                                          | 1280                                                                |
| $\theta$ range for data collection [°]                       | 3.06 – 29.65                                                                     | 3.27 – 25.70                                                                                  | 3.00 – 26.05                                                        |
| Index ranges                                                 | -15 ≤ <i>h</i> ≤ 24,<br>-15 ≤ <i>k</i> ≤ 16,<br>-17 ≤ <i>l</i> ≤ 17              | -12 ≤ <i>h</i> ≤ 18,<br>-21 ≤ <i>k</i> ≤ 21,<br>-58 ≤ <i>l</i> ≤ 58                           | -13 ≤ <i>h</i> ≤ 13,<br>-10 ≤ <i>k</i> ≤ 17,<br>-30 ≤ <i>l</i> ≤ 33 |
| Reflections collected                                        | 20187                                                                            | 22420                                                                                         | 14685                                                               |
| Reflections unique                                           | 7135 [ <i>R</i> <sub>int</sub> = 0.0156]                                         | 3529 [ <i>R</i> <sub>int</sub> = 0.0677]                                                      | 7699 [ <i>R</i> <sub>int</sub> = 0.062]                             |
| Refinement method                                            | Full-matrix least-squares on <i>F</i> <sup>2</sup>                               | Full-matrix least-squares on <i>F</i> <sup>2</sup>                                            | Full-matrix least-squares on <i>F</i> <sup>2</sup>                  |
| Data/Restraints/Parameters                                   | 7135/556/443                                                                     | 3529/182/202                                                                                  | 7699/0/366                                                          |
| Absorption correction                                        | Multi-Scan                                                                       | Multi-Scan                                                                                    | Analytical                                                          |
| Goodness-of-fit on <i>F</i> <sup>2</sup> ( <i>GOF</i> )      | 1.075                                                                            | 1.055                                                                                         | 1.008                                                               |
| Final <i>R</i> indices [ <i>I</i> > 2 $\sigma$ ( <i>I</i> )] | <i>R</i> <sub>1</sub> = 0.0200,<br><i>wR</i> <sub>2</sub> = 0.0536               | <i>R</i> <sub>1</sub> = 0.0580,<br><i>wR</i> <sub>2</sub> = 0.1411                            | <i>R</i> <sub>1</sub> = 0.0738<br><i>wR</i> <sub>2</sub> = 0.1515   |
| <i>R</i> indices (all data)                                  | <i>R</i> <sub>1</sub> = 0.0221,<br><i>wR</i> <sub>2</sub> = 0.0552               | <i>R</i> <sub>1</sub> = 0.1093,<br><i>wR</i> <sub>2</sub> = 0.1624                            | <i>R</i> <sub>1</sub> = 0.1257,<br><i>wR</i> <sub>2</sub> = 0.1688  |
| Largest difference peak and hole (e Å <sup>-3</sup> )        | 0.714 and -0.600                                                                 | 0.762 and -0.468                                                                              | 0.827 and -0.546                                                    |
